# Supplementary material for: Redesigning value-based hospital structures: a qualitative study on value-based health care in the Netherlands
Source: Springer Nature journal article supplement (doi:10.1186/s12913-022-08564-4), 2022-09-22
Supplement: MOESM3 [file 23527440]

### Additional file 3. Coding scheme (value-based hospital structures)

#### Main codes

#### subcodes

---

#### *Initial (deductive) codes*

- DP Unit size

---

- DP Unit grouping
  - Market-based (grouping)

---

- DP Liaison devices
  - Commission (liaison)
  - Position (liaison)
  - Matrix (liaison)

---

- DP Planning & control systems
  - Outcomes
  - Costs

---

- DP Training and indoctrination

---

- DP Job specialization

---

- DP Formalization of behavior

---

- DP Decentralization

---

#### *Additional (inductive) codes*

- Transition

---

- Interdependencies of work(flow)

---

- Strategy/vision

---

- Extra/not specified
