# Supplementary material for: Redesigning value-based hospital structures: a qualitative study on value-based health care in the Netherlands
Source: BMC Health Serv Res. 2022 Sep 22;22:1193. doi: 10.1186/s12913-022-08564-4 (PMC9502905; doi:10.1186/s12913-022-08564-4)
Supplement: Supplementary file 2 — Additional file 2. Interview guide and topic list. [file 12913_2022_8564_MOESM2_ESM.pdf]

## Additional file 2. Interview guide and topic lists (for interviews and focus group)

### Interview guide

#### Introduction

Background and research objective; informed consent and anonymization.

| Main questions                                                                                                                                                                                                              | Topics                                                                            |
|-----------------------------------------------------------------------------------------------------------------------------------------------------------------------------------------------------------------------------|-----------------------------------------------------------------------------------|
| What is your role within the hospital?                                                                                                                                                                                      |                                                                                   |
| How is your hospital working on coordination and organization around medical conditions?                                                                                                                                    | Organizational structures, multidisciplinary teams                                |
| To what extent did the hospital shift (i.e. change) its (traditional) organizational structure towards units for medical conditions?                                                                                        | Unit grouping, liaison (matrix)                                                   |
| To what extent do your units/teams have formal authority?<br><br>How and to what extent are your units/teams held accountable for their performance (outcomes/costs)?<br><br>How are decisions made about scarce resources? | Unit grouping, decentralization, authority, accountability, decision-making power |
| What is the composition of your multidisciplinary teams/units (who is in it, how many, and why)?                                                                                                                            | Unit size, unit grouping, liaisons, job specialization                            |
| How is (informal) contact and coordination of work/tasks facilitated within teams / between unit members?<br><br>How is (informal) contact and coordination facilitated across units/teams?                                 | Liaison (positions, committees), formalization of behavior                        |
| To what extent are tasks and responsibilities formalized within teams/units?                                                                                                                                                | Formalization of behavior                                                         |
| What does the planning and control cycle of MD teams / condition-based units look like?                                                                                                                                     | Planning and control, outcomes, costs                                             |
| How are outcome measurements monitored?                                                                                                                                                                                     | Outcome measurement, liaison                                                      |

|                                                                                                                                                                                       |                                      |
|---------------------------------------------------------------------------------------------------------------------------------------------------------------------------------------|--------------------------------------|
| How are costs measured and monitored?                                                                                                                                                 | Cost accounting                      |
| How and to what extent do you proliferate knowledge, information, norms and skills about VBHC and coordination around medical conditions?                                             | Training and indoctrination          |
| What have you learned thus far, about what works and what does not?<br><br>What do you see as challenges for proceeding with the condition-based organization of health care?         |                                      |
| <b>Additional questions</b>                                                                                                                                                           |                                      |
| What is the minimal size of a unit/team?                                                                                                                                              | Unit size                            |
| What does the leadership of a unit/team look like? (How are teams/units guided?)                                                                                                      | Liaison, job specialization          |
| How is (informal) contact and coordination facilitated across units/teams?                                                                                                            | Liaison                              |
| To what extent, how often, and on which topics do meetings take place among team members? And meeting between the unit/team and other layers in the organization (such as the board)? | Liaison                              |
| Do units/teams have and/or make their own annual budget?                                                                                                                              | Planning & control, decentralization |
| How do multidisciplinary teams come into being within your hospital?                                                                                                                  |                                      |

## Topic list focus group

- The progressions of Dutch hospitals regarding organization around medical conditions (VBHC).
- What may we have overlooked (i.e. hospitals, teams, design parameters)?
- Organizational redesign: completely switching vs. matrix structure.
- Measuring costs (challenges).
- Top-down versus bottom-up creation of multidisciplinary teams.
